# Supplementary material
Source: PubMed Central journal article supplement (PMC3009880)
Supplement: supp_M110.171355_jbc.M110.171355-1.pdf [file supp_M110.171355_jbc.M110.171355-1.pdf]

**Supplemental Table S1.**

|            |                       | <b>Nucleating Rate (x 10<sup>-3</sup>)</b> | <b>Elongation Rate (x10<sup>-3</sup>)</b> |
|------------|-----------------------|--------------------------------------------|-------------------------------------------|
| <b>(a)</b> | Apo                   | 0.037 (0.017)                              | 0.117 (0.007)                             |
|            | 50% Cu <sup>2+</sup>  | 0.16 (0.03)                                | 0.147 (0.004)                             |
| <b>(b)</b> | Apo                   | 0.19 (0.07)                                | 0.098 (0.008)                             |
|            | 100% Cu <sup>2+</sup> | 0.15 (0.06)                                | 0.19 (0.00)                               |
| <b>(c)</b> | Apo                   | 0.41 (0.08)                                | 0.073 (0.005)                             |
|            | 100% Cu <sup>2+</sup> | 1.1 (0.4)                                  | 0.14 (0.02)                               |

**Supplemental Table S1**, shows the nucleating and elongation rate obtained from Equation 2 (Morris *et al* 2008) for the same data shown in Figure 1.  $k_1$  describes the monomer converting into a nucleating species. While  $k_2$  describes monomer addition on to the nucleating species (elongation). It should be noted that  $k_2$  is simply an average rate of multiple additions and assumes that the rate constant is independent of fibre size.

$$[B]_t = [A]_0 - \frac{k_1/k_2 + [A]_0}{1 + k_1/k_2[A]_0} \exp(k_1 + k_2[A]_0)t \quad (\text{Eq 2})$$

Where  $[B]_t$  is the fibrillar concentration as measured by the ThT signal and  $[A]_0$  is the total concentration of A $\beta$  in monomeric and fibrillar form:  $[A]_0 = [B]_t + [A]_t$  (where  $[A]_t$  is the amount of monomer at time t).  $k_1$  (units of hrs<sup>-1</sup>) is proportional to 1/lag time and  $k_2[A]_0$  is proportional to the slope during elongation.

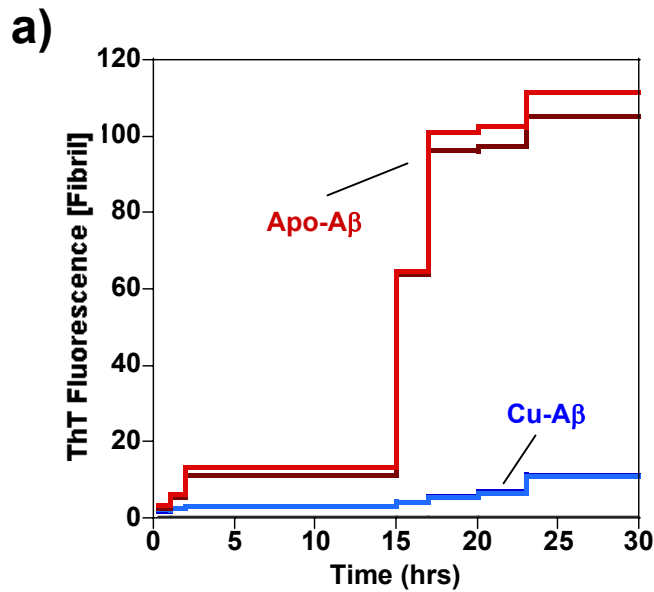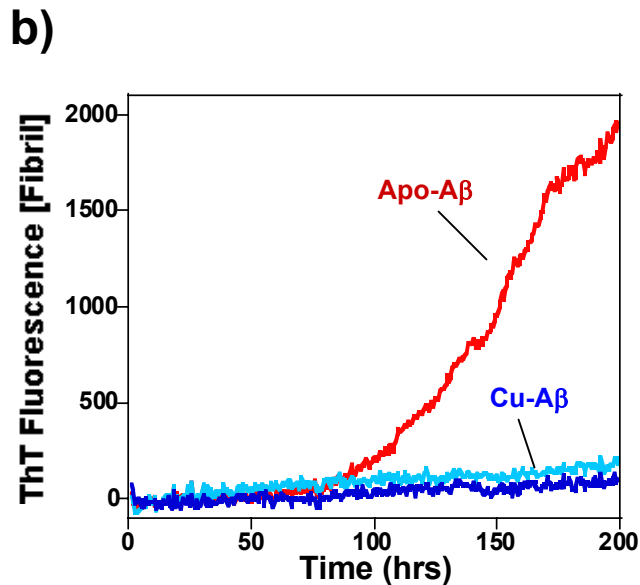

**Supplemental Figure S1: Cu<sup>2+</sup> only at high A $\beta$  concentration or supra-stoichiometric levels will inhibit fibre formation.**

a) 50  $\mu$ M A $\beta$ (1-40). Apo A $\beta$  (red traces). Cu<sup>2+</sup> ions, 0.5 mole equivalent (blue traces).

b) 5  $\mu$ M A $\beta$ (1-40). No Cu<sup>2+</sup> ions (red trace); 2 mole equivalents of Cu<sup>2+</sup> (light blue) and 4 mole equiv Cu<sup>2+</sup> (dark blue). Average of n=6, 50 mM HEPES buffer and 160 mM NaCl, pH 7.4 at 30 °C, 30 seconds agitation every 30 minutes.

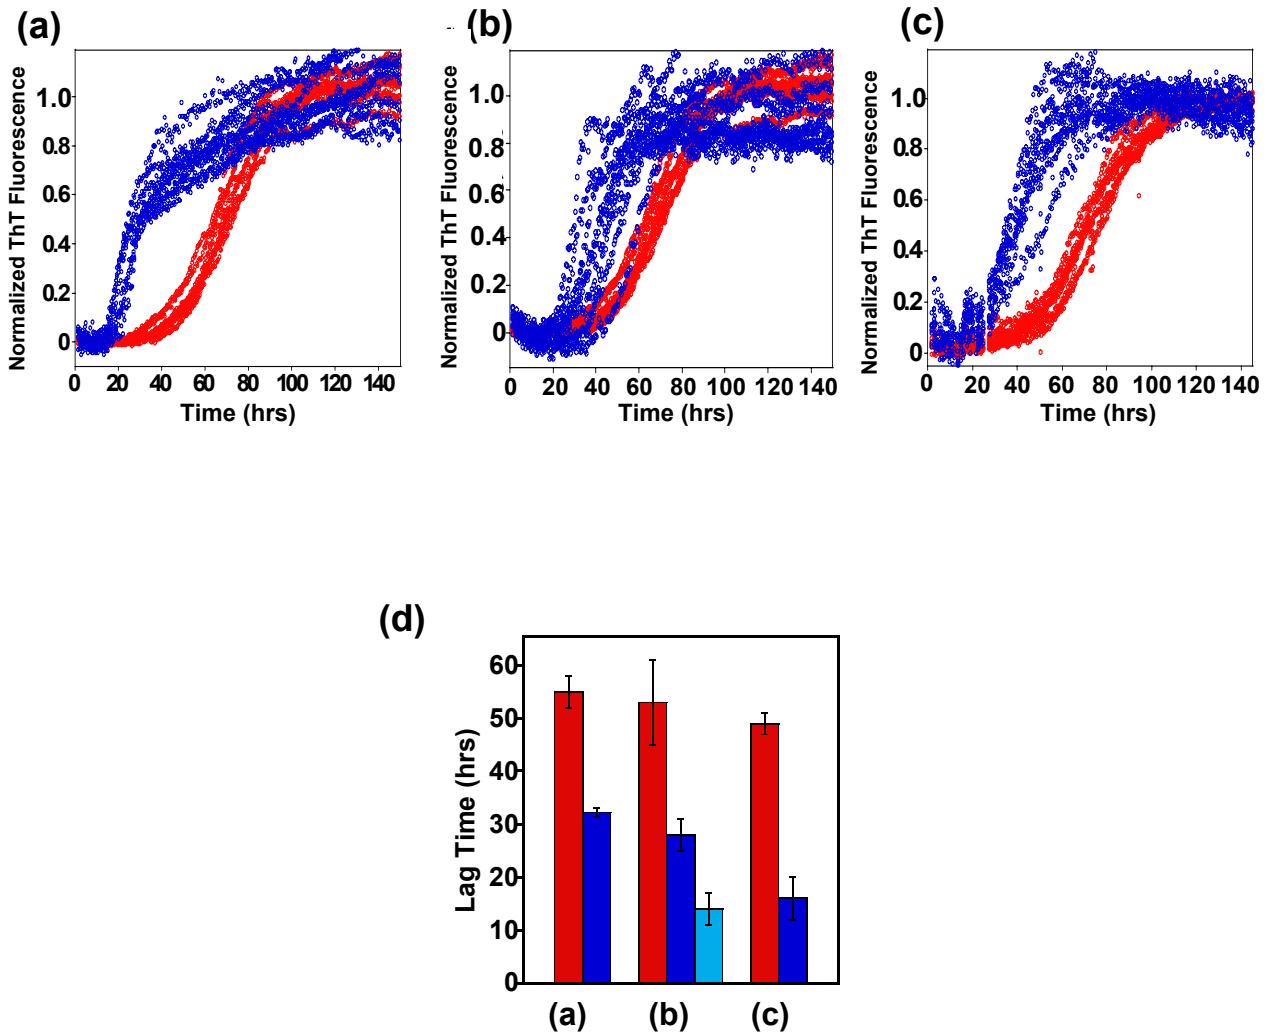

**Supplemental Figure S2: Cu<sup>2+</sup> accelerates Aβ fibril growth.** Comparison of Cu<sup>2+</sup> loaded (blue traces) and Cu<sup>2+</sup>-free (red traces). Aβ(1-40) at 5 μM, pH 7.4 in the presence of a) 2.5 μM Cu<sup>2+</sup>, or 5 μM Cu<sup>2+</sup> in b) and c). All carried out in 50 mM HEPES, 160mM NaCl, 30° C, with agitation for 30 seconds every 30 minutes. Figures b) and c) are from two separate experiments. The ThT fluorescence intensities have been normalized. Averages of the nine traces are shown in Fig. 1(b). (d) Bar-graph of  $t_{lag}$  with apo-Aβ shown as red bars, and Aβ with 1 mole equivalent Cu<sup>2+</sup> (dark blue bars) and 0.5 mole equivalent Cu<sup>2+</sup> (light blue bar).

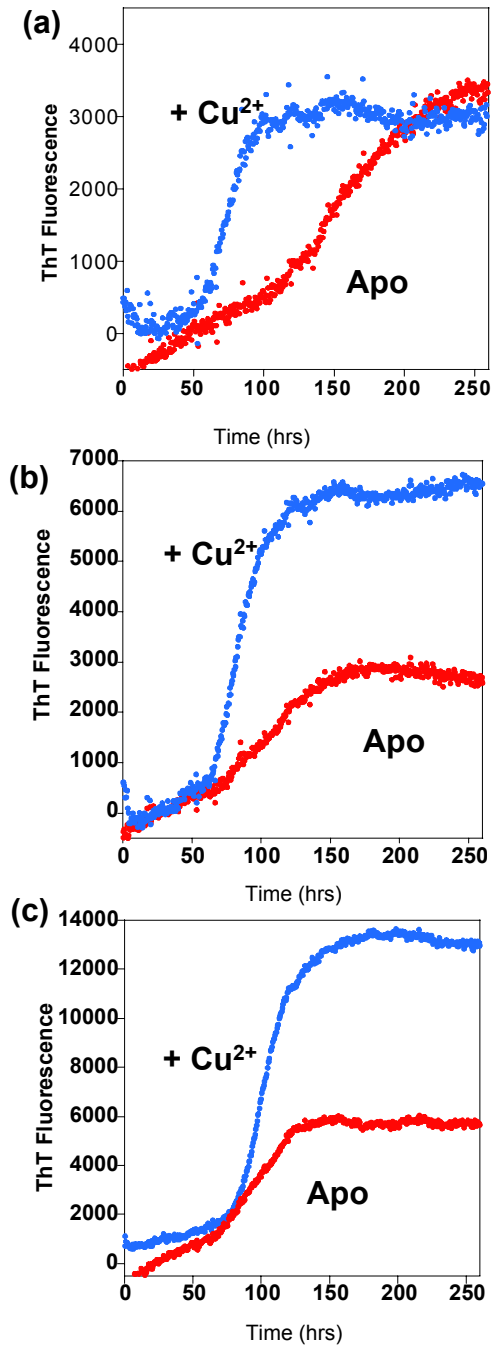

**Supplemental Figure S3: Cu<sup>2+</sup> accelerates Aβ(1–42) fibril growth.** Aβ(1-42) at 1 μM (a), 3 μM (b) and 5 μM (c) with and without 0.5 mole equivalents Cu<sup>2+</sup> ions. Growth curves are a sum of 6 traces. Absolute ThT fluorescence intensity. All carried out in 50 mM HEPES, 160mM NaCl, 30° C, with agitation for 30 seconds every 30 minutes.

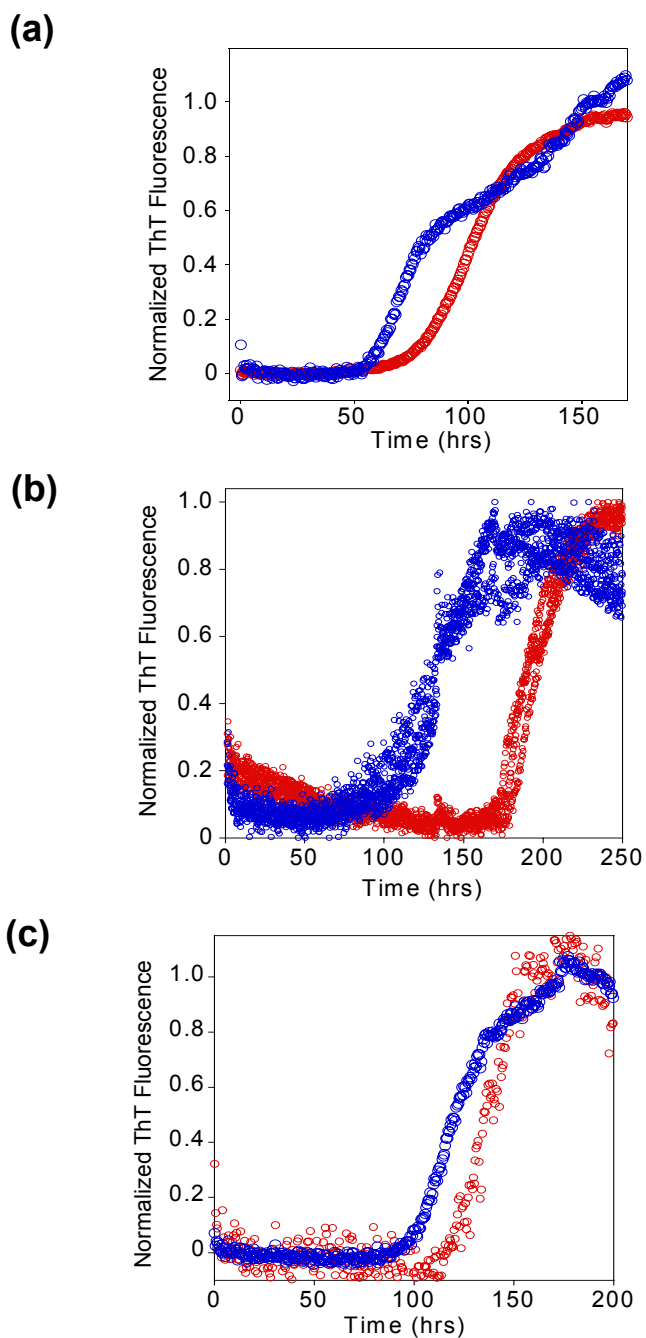

**Supplemental Figure S4: Cu<sup>2+</sup> accelerates Aβ fibril growth over a range of pH's.** (a) pH 8 (b) pH 8.5 and (c) pH 9. Blue traces are for Aβ(1-40) with 1 mole equivalent Cu<sup>2+</sup>, red traces are for apo Aβ(1-40). (a) and (c) are means of the fluorescence from six growth curves. Aβ(1-40) at 5 μM in 50 mM HEPES, 160 mM NaCl.

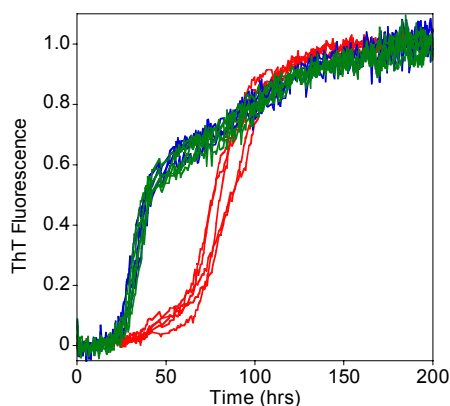

**Supplemental Figure S5: Fibril growth with  $\text{Cu}^{2+}$  as a  $\text{Cu}(\text{Gly})_2$  chelate.** Comparison of  $5 \mu\text{M}$   $\text{A}\beta(1-40)$  with no  $\text{Cu}^{2+}$  (red spectra),  $2.5 \mu\text{M}$   $\text{Cu}^{2+}$  (blue spectra) and  $2.5 \mu\text{M}$   $\text{Cu}^{2+}(\text{glycine})_2$  chelate (green spectra). The ThT fluorescence intensities of the data have been normalized, however the addition of glycine made no difference to either the rate or intensity of the fibril growth curve compared to adding  $\text{Cu}^{2+}$  alone and the sets of traces (2 x 5 traces) overlap.  $5 \mu\text{M}$   $\text{A}\beta(1-40)$  in 50 mM HEPES, 160 mM NaCl, pH 7.4,  $30^\circ \text{C}$ , with agitation for 30 seconds every 30 minutes.

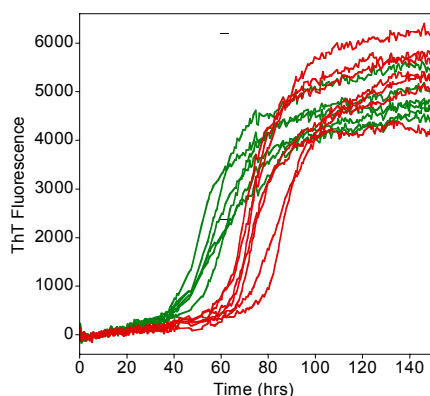

**Supplemental Figure S6:  $\text{Cu}^{2+}$  induced fibrils will seed fibril formation.** Comparison of  $5.5 \mu\text{M}$  apo  $\text{A}\beta(1-40)$  (red traces) and  $5 \mu\text{M}$  apo- $\text{A}\beta$  with 10% preformed ( $\text{Cu}^{2+}$  promoted)  $\text{A}\beta$ -fibrils (green traces). All carried out in 50 mM HEPES, 160mM NaCl, pH 7.4,  $30^\circ \text{C}$ , with agitation for 30 seconds every 30 minutes. The fluorescence intensities are absolute values.

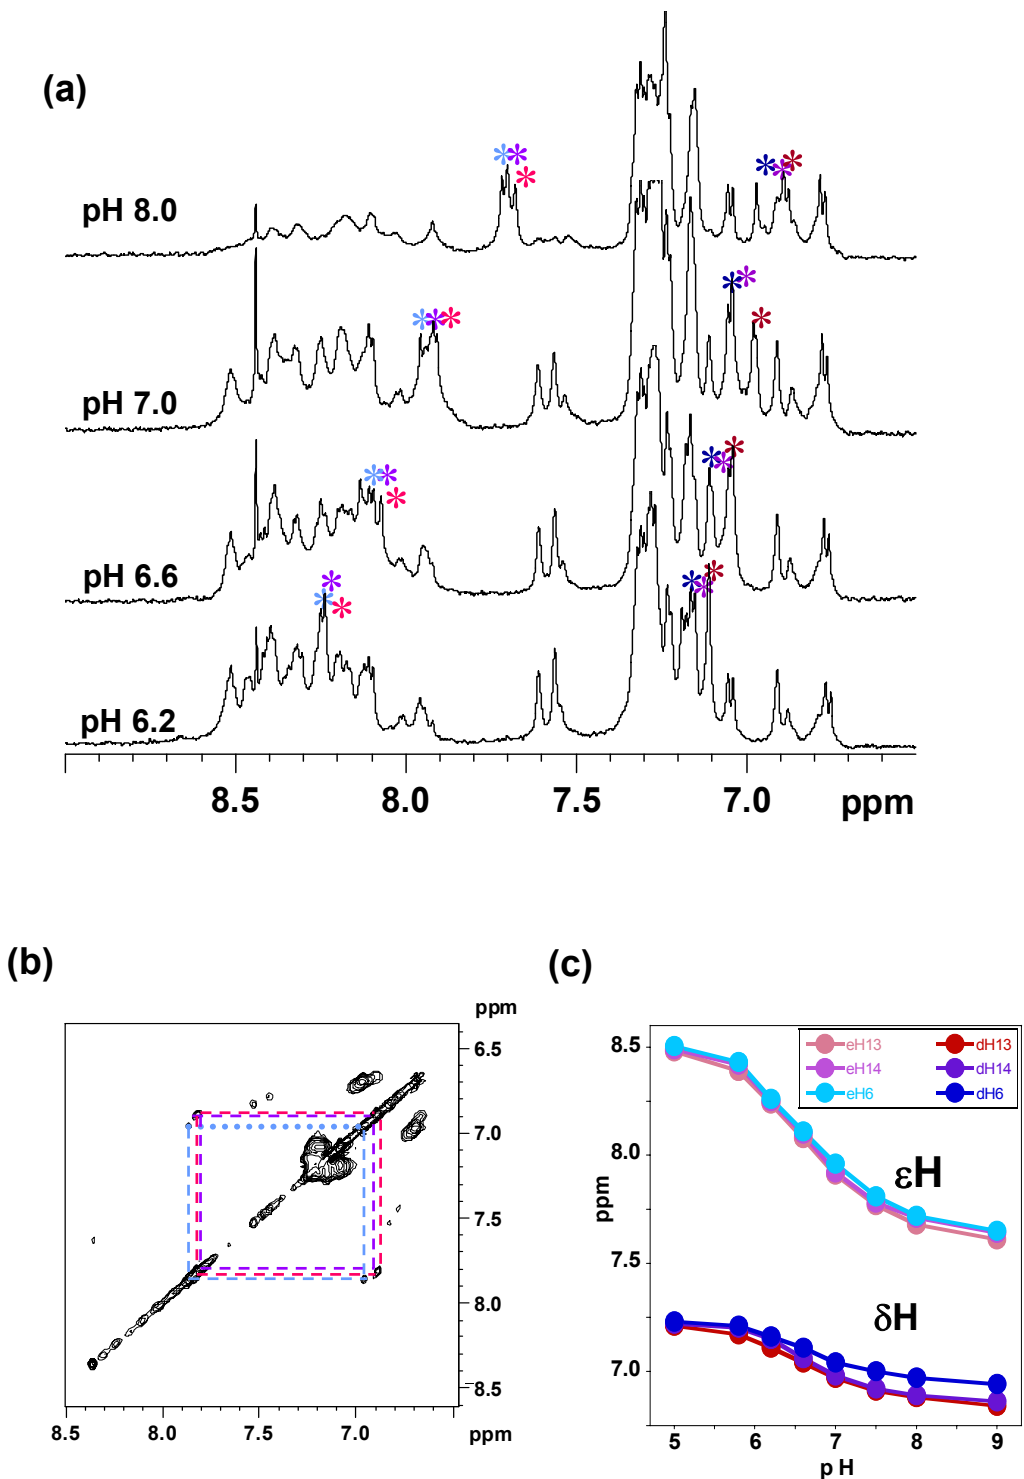

**Supplemental Fig. S7: pKa measurements of A $\beta$  histidine residues.** a) A selection of 1D  $^1\text{H}$  NMR spectra from a pH titration, 100  $\mu\text{M}$  A $\beta$ (1-28) in 20 mM phosphate buffer at 25  $^\circ\text{C}$ . C $\delta\text{H}$  and C $\epsilon\text{H}$  singlets are highlighted. b) 2D TOCSY spectrum of histidine region of A $\beta$ (1-28), pH 7, 60 ms spin-lock mixing time. c) pH dependence of C $\delta\text{H}$  and C $\epsilon\text{H}$   $^1\text{H}$  chemical shift. pKa are: 6.67, 6.67 and 6.64 at 25  $^\circ\text{C}$  in 90%  $\text{H}_2\text{O}$  10%  $\text{D}_2\text{O}$ . Note that the amide protons become more intense at pH 7 and below.

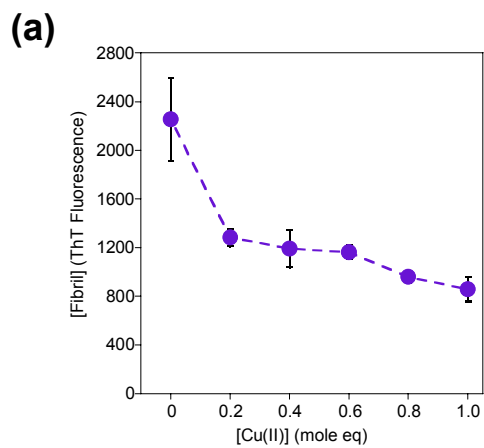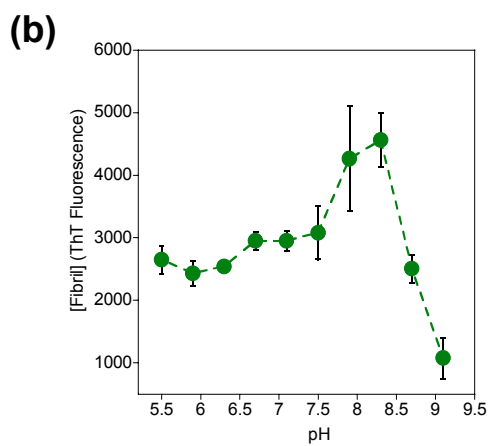

**Supplemental Fig. S8: Effect of  $\text{Cu}^{2+}$  concentration and pH on total fibril levels.** a) Effect of  $\text{Cu}^{2+}$  on the maximal ThT fluorescence signal. At 2 and 4 mole equivalent  $\text{Cu}^{2+}$  the fibril growth is inhibited. b) The effect of pH on the maximum fluorescence. 5  $\mu\text{M}$  A $\beta$  in 50 mM HEPES, 160 mM NaCl, at pH 7.4, 30 °C, with intermittent agitation.



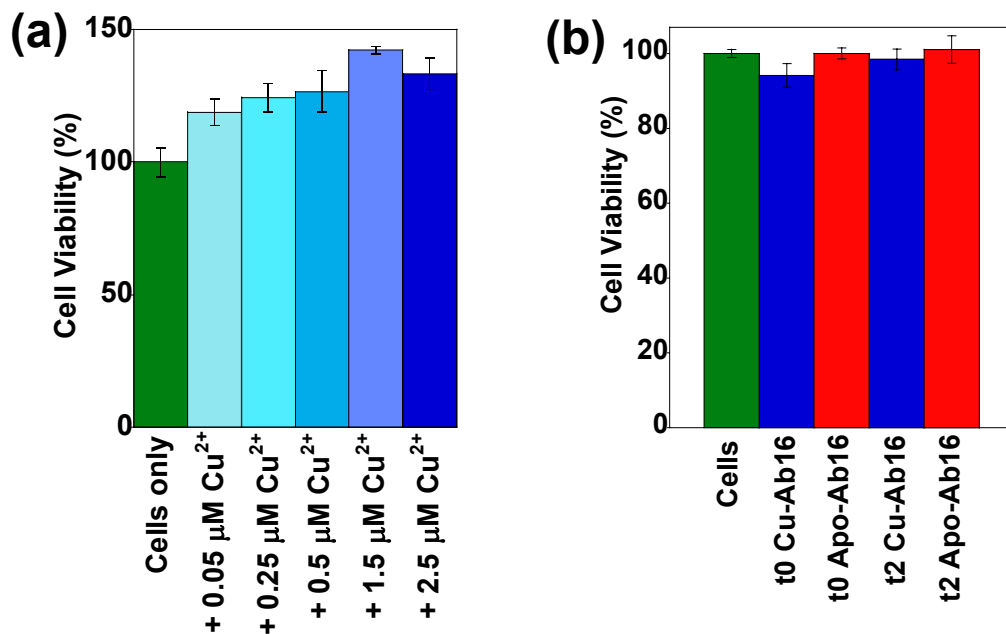

**Supplemental Figure S9: Free  $\text{Cu}^{2+}$  ions and  $\text{Cu}^{2+}$  ions bound to soluble A $\beta$ (1-16) are not cyto-toxic.** (a)  $\text{Cu}^{2+}$  ions were added as  $\text{CuCl}_2$  and incubated with PC12 cells for 24 hrs, Alamar blue was then added and cell viability compared. Data is shown after 70 hours total incubation. At 6 days Alamar Blue was added again and additional readings taken (data not shown), cell viability in the presence of  $\text{Cu}^{2+}$  was again comparable to the viability of cells without  $\text{Cu}^{2+}$  ions. The cell concentration was  $5.9 \times 10^4$  cells/ml. (b)  $\text{Cu}^{2+}$ -A $\beta$ (1-16) was added to cells (t0) or incubated for 200 hours (t2) under fibril forming conditions to confirm fibrils did not form and to mimic the conditions of experiments with full-length A $\beta$ . The preparations were then incubated with PC12 cells. Cell concentration was  $5.9 \times 10^4$  cells/ml. Alamar Blue was added after 24 hrs incubation. For both (a) and (b) error bars are standard error.

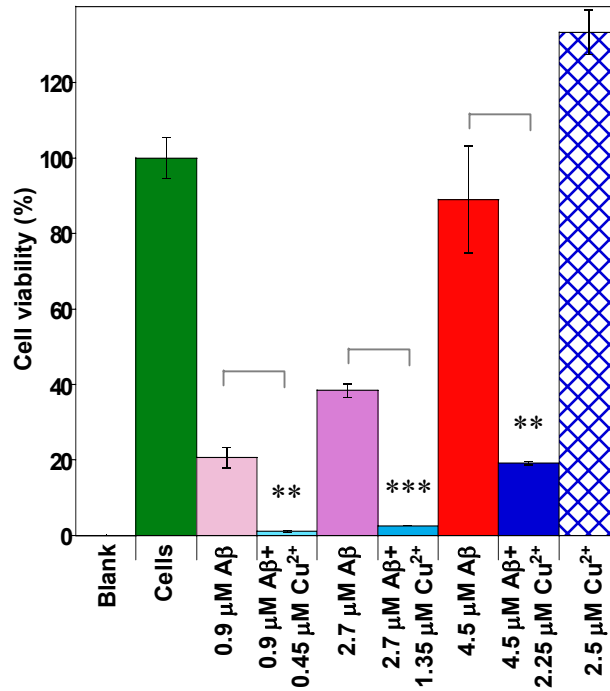

**Supplemental Figure S10. Cu<sup>2+</sup>-Aβ(1-42) is more cyto-toxic than Aβ(1-42).** Cu<sup>2+</sup>-Aβ(1-42) 1, 3 and 5 μM Aβ(1-42) fibrils were formed with and without 0.5 mol eq Cu<sup>2+</sup> ions. After fibril formation (monitored by ThT) the fibrils were added to 10% (v/v) PC12 cells. Cell concentration was 5.9 x 10<sup>4</sup> cells/ml. 2.5 μM Cu<sup>2+</sup> was added to the cells alone to test Cu<sup>2+</sup> toxicity. Blank is buffer only. All preparations were incubated with the cells for 24 hrs then 10% (v/v) Alamar Blue was added. The data shown here is after total incubation for 70 hrs. Error bars are standard error (s.e.m). P= 0.001 indicated by \*\*\* and P=0.01 \*\* .
